# Supplementary material for: Two scandium-based coordination polymers: rapid ultrasound-assisted synthesis, crystal transformation, and catalytic properties
Source: Royal Society of Chemistry journal article supplement (doi:10.1039/d1ce01206a), 2021-01-01
Supplement: d1ce01206a1.pdf [file d1ce01206a1.pdf]

*Supporting Information for*

Two Scandium-Based Coordination Polymers:  
Rapid Ultrasound-Assisted Synthesis, Crystal  
Transformation, and Catalytic Property

*Rui Liu<sup>a</sup>, Yansong Jiang<sup>a b</sup>, Yiran Gong<sup>a</sup>, Yu Fu<sup>a</sup>, Jieyu Shen<sup>a</sup>, Li Wang<sup>a</sup>, Yong Fan<sup>a</sup>,*

*Yupeng Guo<sup>a</sup>, Jianing Xu<sup>a\*</sup>*

a College of Chemistry, Jilin University, Changchun, 130012, Jilin, People's Republic of  
China

b South China Advanced Institute for Soft Matter Science and Technology, School of  
Molecular Science and Engineering, South China University of Technology, Guangzhou,  
510640 Guangdong Province, P. R. China

Email: [xujn@jlu.edu.cn](mailto:xujn@jlu.edu.cn)

## Contents

---

|                                                                                                    |     |
|----------------------------------------------------------------------------------------------------|-----|
| <b>Fig. S1</b> Layers stacking modes of <b>1</b> and <b>2</b>                                      | S3  |
| <b>Fig. S2</b> PXRD pattern of <b>1</b> .                                                          | S4  |
| <b>Fig. S3</b> PXRD pattern of <b>2</b> .                                                          | S5  |
| <b>Fig. S4</b> PXRD patterns of <b>1-u</b> .                                                       | S6  |
| <b>Fig. S5</b> PXRD patterns of <b>2-u</b> .                                                       | S7  |
| <b>Fig. S6</b> FT-IR spectra.                                                                      | S8  |
| <b>Fig. S7</b> TG curves.                                                                          | S9  |
| <b>Fig. S8</b> Pore size distribution and N <sub>2</sub> adsorption/desorption isomers of <b>2</b> | S10 |
| <b>Fig. S9</b> Effect of conversion yield with time.                                               | S11 |
| <b>Fig. S10</b> Recycle studies of <b>2-u</b> .                                                    | S12 |
| <b>Fig. S11</b> PXRD patterns of <b>2</b> after catalysis of cyanosilylation.                      | S13 |
| <b>Fig. S12</b> PXRD patterns of <b>2</b> after catalysis of Strecker reaction.                    | S14 |
| <b>Table S1</b> Crystal data and structure refinement for <b>1-2</b> .                             | S15 |
| <b>Table S2</b> Selected bond lengths [Å] for <b>1</b> .                                           | S16 |
| <b>Table S3</b> Selected bond lengths [Å] for <b>2</b> .                                           | S17 |
| <b>Table S4</b> Selected angles [°] for <b>1</b> .                                                 | S18 |
| <b>Table S5</b> Selected angles [°] for <b>2</b> .                                                 | S19 |
| <b>Table S6</b> Specified hydrogen bonds for <b>1</b> .                                            | S20 |
| <b>Table S7</b> Specified hydrogen bonds for <b>2</b> .                                            | S21 |

---

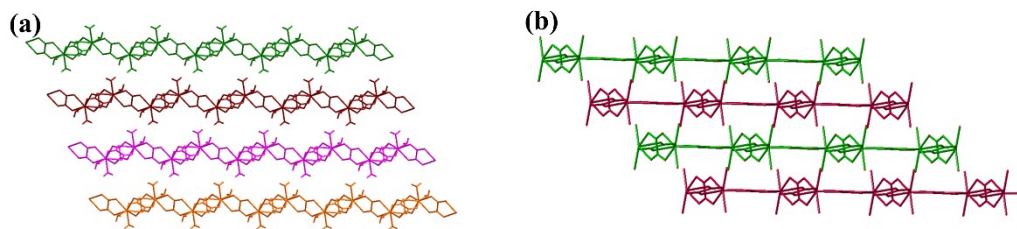

**Fig. S1** Layers stacking modes of **1** (a) and **2** (b)

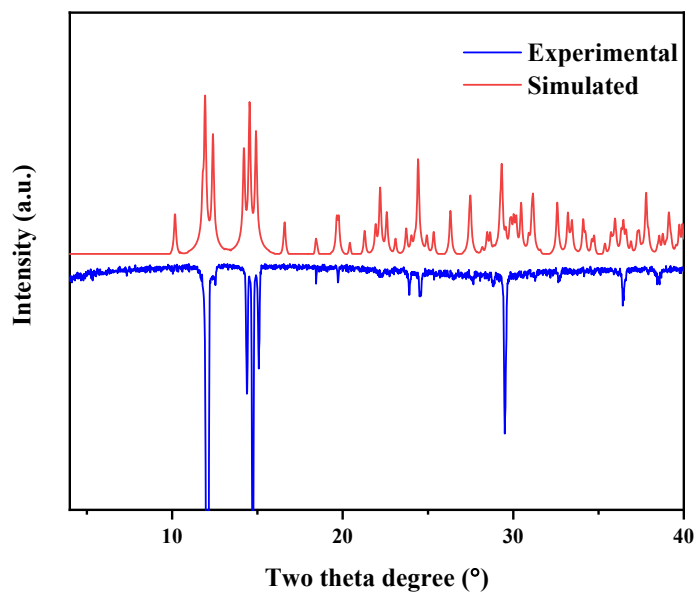

**Fig. S2** PXRd pattern of **1**.

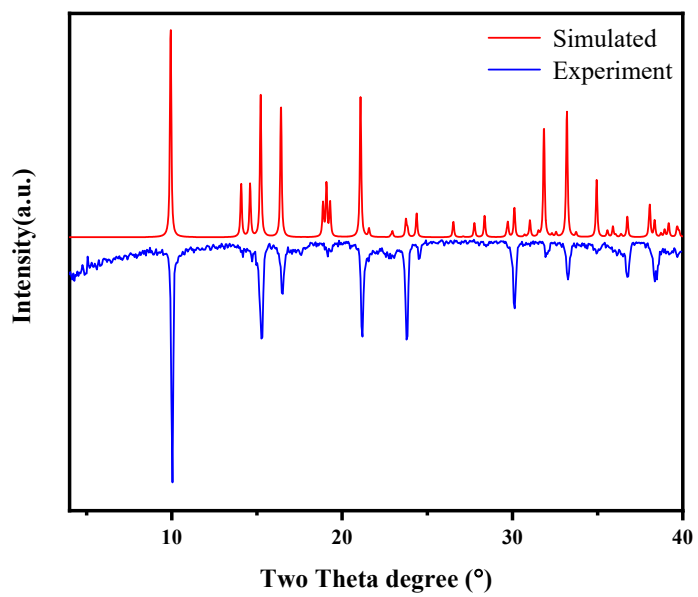

**Fig. S3** PXR D pattern of **2**.

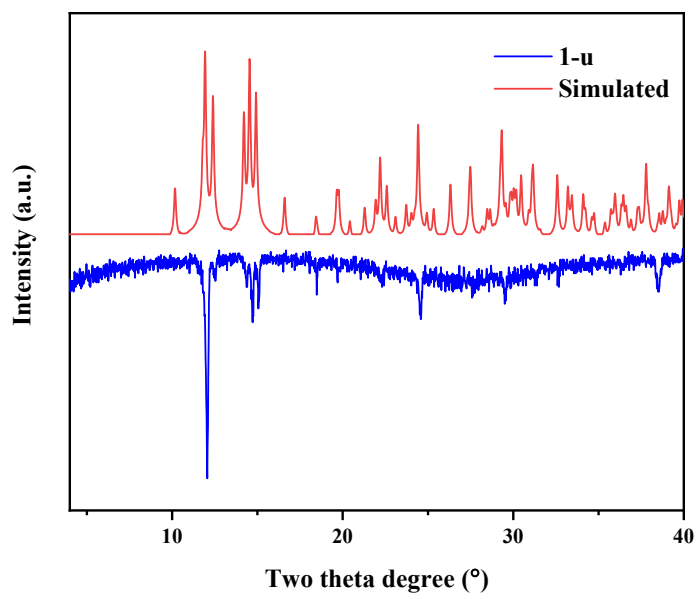

**Fig. S4** PXRD patterns of **1-u**.

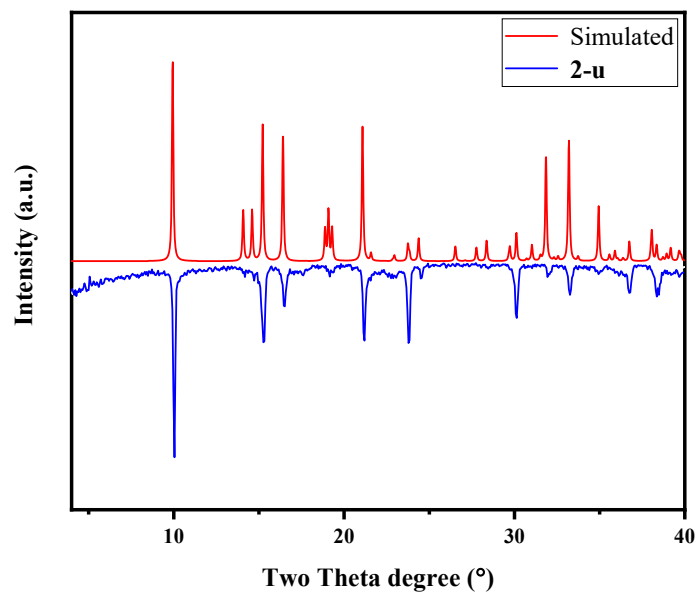

**Fig. S5** PXRd patterns of **2-u**.

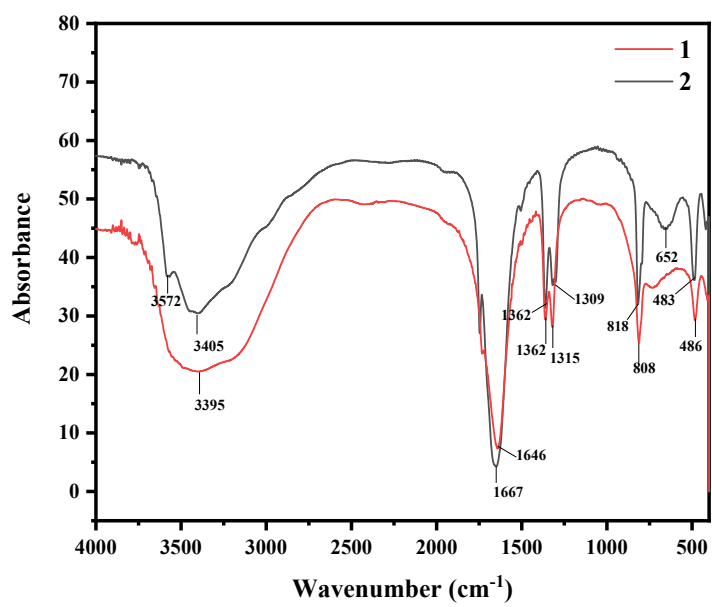

**Fig. S6** FT-IR spectra.



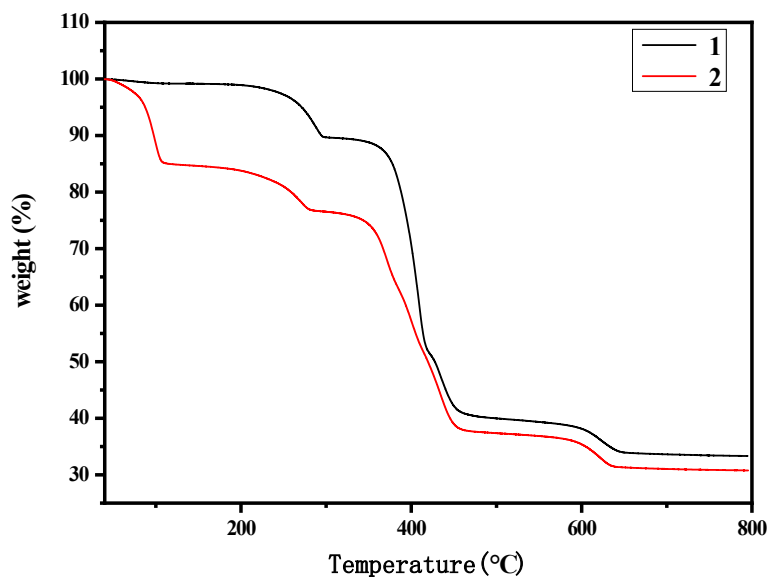

**Fig. S7** TG curves.

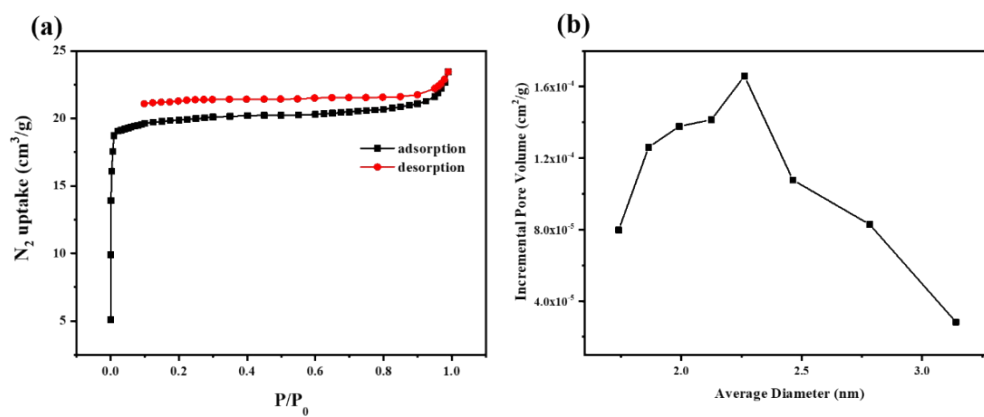

**Fig. S8** pore size distribution and  $N_2$  adsorption/desorption isomers of **2**

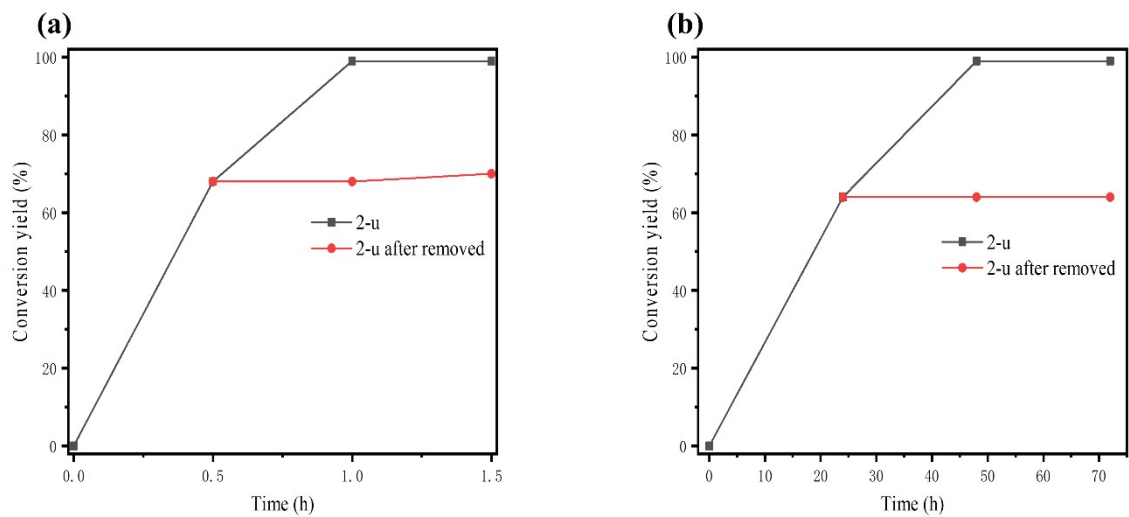

**Fig. S9** Effect of conversion yield with time of (a) cyanosilylation and (b) Stricker reaction.

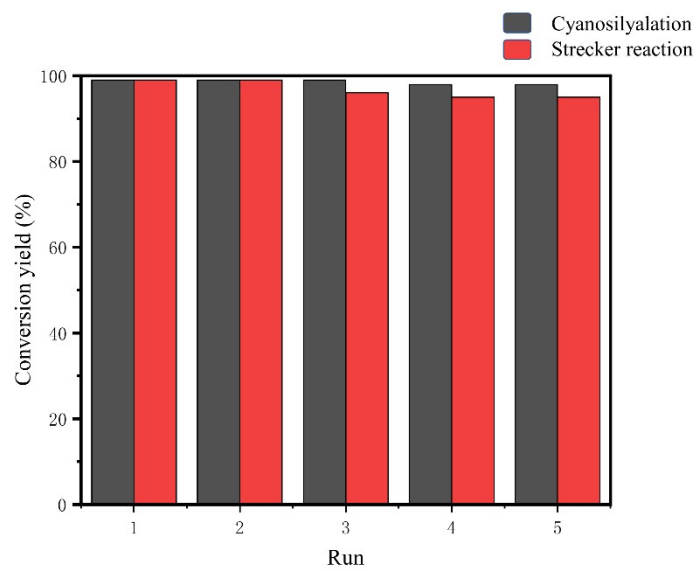

**Fig. S10** Recycle studies of **2-u**.

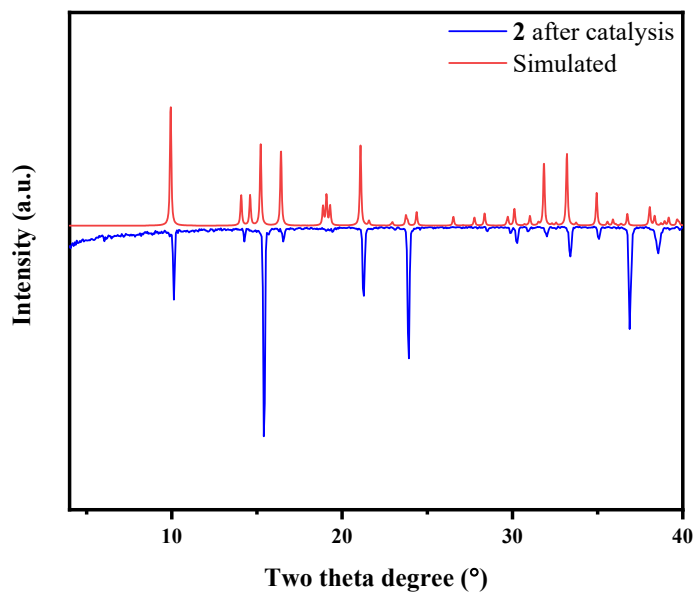

**Fig. S11** PXR D patterns of **2** after catalysis of cyanosilylation.

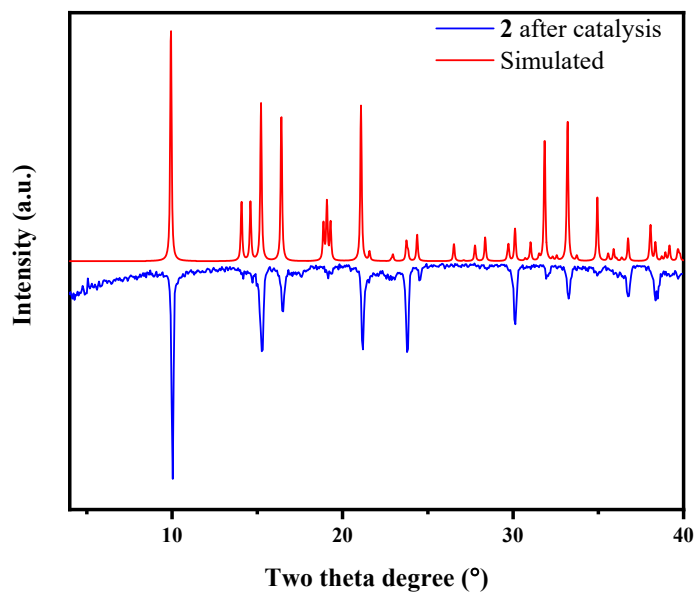

**Fig. S12** PXRD patterns of **2** after catalysis of Strecker reaction.

**Table S1** Crystal data and structure refinement for **1-2**.

|                                                                            |                                                   |                                                 |
|----------------------------------------------------------------------------|---------------------------------------------------|-------------------------------------------------|
| Chemical formula                                                           | C <sub>3</sub> H <sub>12</sub> O <sub>12</sub> Sc | C <sub>3</sub> H <sub>6</sub> O <sub>9</sub> Sc |
| $M_r$                                                                      | 285.09                                            | 231.04                                          |
| Crystal system, space group                                                | Triclinic, <i>P</i> -1                            | Triclinic, <i>P</i> -1                          |
| Temperature (K)                                                            | 298                                               | 293                                             |
| $a$ (Å)                                                                    | 7.8876 (5)                                        | 6.1711 (12)                                     |
| $b$ (Å)                                                                    | 8.3604 (6)                                        | 6.5104 (14)                                     |
| $c$ (Å)                                                                    | 9.6680 (7)                                        | 9.2896 (17)                                     |
| $\alpha$ (°)                                                               | 65.082 (2)                                        | 75.586 (17)                                     |
| $\beta$ (°)                                                                | 76.419 (2)                                        | 80.143 (16)                                     |
| $\gamma$ (°)                                                               | 73.429 (2)                                        | 83.472 (17)                                     |
| $V$ (Å <sup>3</sup> )                                                      | 549.34 (7)                                        | 355.15 (13)                                     |
| $Z$                                                                        | 2                                                 | 2                                               |
| Radiation type                                                             | Mo $K\alpha$                                      | Mo $K\alpha$                                    |
| $\mu$ (mm <sup>-1</sup> )                                                  | 0.73                                              | 1.07                                            |
| Diffractometer                                                             | Bruker D8 venture                                 | Bruker D8 venture                               |
| Absorption correction                                                      | Multi-scan                                        | Multi-scan                                      |
| $T_{\min}$ , $T_{\max}$                                                    | 0.917, 0.930                                      | 0.443, 0.633                                    |
| No. of measured, independent and observed [ $I > 2\sigma(I)$ ] reflections | 5795, 2034, 1767                                  | 2560, 1622, 1319                                |
| $R_{\text{int}}$                                                           | 0.058                                             | 0.033                                           |
| $(\sin \theta/\lambda)_{\text{max}}$ (Å <sup>-1</sup> )                    | 0.604                                             | 0.689                                           |
| $R[F^2 > 2\sigma(F^2)]$ , $wR(F^2)$ , $S$                                  | 0.047, 0.137, 1.06                                | 0.052, 0.146, 1.07                              |
| No. of reflections                                                         | 1940                                              | 1622                                            |
| No. of parameters                                                          | 147                                               | 123                                             |
| $\Delta\rho_{\text{max}}$ , $\Delta\rho_{\text{min}}$ (e Å <sup>-3</sup> ) | 0.94, -0.40                                       | 0.80, -0.75                                     |

**Table S2** Selected bond lengths [Å] for **1**.

| <b>Bond</b>              | <b>Length/Å</b> | <b>Bond</b>              | <b>Length/Å</b> |
|--------------------------|-----------------|--------------------------|-----------------|
| Sc01—O008                | 2.140 (2)       | O003—C00B                | 1.264 (3)       |
| Sc01—O00A                | 2.172 (2)       | O004—C00D                | 1.255 (3)       |
| Sc01—O003                | 2.186 (2)       | O005—C00D                | 1.244 (3)       |
| Sc01—O007                | 2.206 (2)       | O005—Sc01 <sup>i</sup>   | 2.2531 (19)     |
| Sc01—O005 <sup>i</sup>   | 2.2531 (19)     | O006—C00C                | 1.236 (4)       |
| Sc01—O004                | 2.2567 (19)     | O006—Sc01 <sup>iii</sup> | 2.366 (2)       |
| Sc01—O002 <sup>ii</sup>  | 2.2631 (19)     | O007—C00C                | 1.260 (3)       |
| Sc01—O006 <sup>iii</sup> | 2.366 (2)       | C00B—C00B <sup>ii</sup>  | 1.525 (5)       |
| O002—C00B                | 1.245 (3)       | C00C—C00C <sup>iii</sup> | 1.528 (5)       |
| O002—Sc01 <sup>ii</sup>  | 2.2632 (19)     | C00D—C00D <sup>i</sup>   | 1.536 (5)       |

Symmetry codes: (i)  $-x+1, -y+1, -z+1$ ; (ii)  $-x+2, -y+1, -z$ ; (iii)  $-x+1, -y+1, -z$ .



**Table S3** Selected bond lengths [ $\text{\AA}$ ] for **2**.

| <b>Bond</b>              | <b>Length/<math>\text{\AA}</math></b> | <b>Bond</b>              | <b>Length/<math>\text{\AA}</math></b> |
|--------------------------|---------------------------------------|--------------------------|---------------------------------------|
| Sc01—O002                | 2.181 (2)                             | O005—C00B                | 1.251 (4)                             |
| Sc01—O009                | 2.207 (3)                             | O005—Sc01 <sup>i</sup>   | 2.239 (2)                             |
| Sc01—O007                | 2.207 (3)                             | O006—C00C                | 1.238 (4)                             |
| Sc01—O008                | 2.235 (3)                             | O007—H00A                | 0.8798                                |
| Sc01—O005 <sup>i</sup>   | 2.239 (2)                             | O007—H00B                | 0.8798                                |
| Sc01—O006                | 2.244 (2)                             | O008—H00C                | 0.8648                                |
| Sc01—O004 <sup>ii</sup>  | 2.258 (3)                             | O008—H00D                | 0.8652                                |
| Sc01—O003 <sup>iii</sup> | 2.259 (2)                             | O009—C00A                | 1.240 (4)                             |
| O002—C00B                | 1.249 (4)                             | C00A—C00A <sup>iii</sup> | 1.534 (6)                             |
| O003—C00A                | 1.256 (4)                             | C00B—C00B <sup>i</sup>   | 1.515 (6)                             |
| O003—Sc01 <sup>iii</sup> | 2.259 (2)                             | C00C—C00C <sup>ii</sup>  | 1.523 (7)                             |
| O004—C00C                | 1.267 (4)                             | O00D—H00E                | 0.8500                                |
| O004—Sc01 <sup>ii</sup>  | 2.258 (3)                             | O00D—H00F                | 0.8500                                |

Symmetry codes: (i)  $-x+1, -y+1, -z$ ; (ii)  $-x+2, -y+2, -z$ ; (iii)  $-x+1, -y+1, -z+1$ .

**Table S4** Selected angles [°] for **1**.

| Angel                       | Angel/°     | Angel                                        | Angel/°    |
|-----------------------------|-------------|----------------------------------------------|------------|
| O008—Sc01—O00A              | 89.52 (10)  | O005 <sup>i</sup> —Sc01—O004                 | 71.48 (7)  |
| O008—Sc01—O003              | 144.38 (8)  | O008—Sc01—O002 <sup>ii</sup>                 | 80.35 (8)  |
| O00A—Sc01—O003              | 103.51 (10) | O00A—Sc01—O002 <sup>ii</sup>                 | 71.09 (8)  |
| O008—Sc01—O007              | 99.27 (9)   | O003—Sc01—O002 <sup>ii</sup>                 | 73.12 (7)  |
| O00A—Sc01—O007              | 150.76 (8)  | O007—Sc01—O002 <sup>ii</sup>                 | 137.73 (7) |
| O003—Sc01—O007              | 85.41 (8)   | O005 <sup>i</sup> —Sc01—O002 <sup>ii</sup>   | 125.97 (7) |
| O008—Sc01—O005 <sup>i</sup> | 142.95 (8)  | O004—Sc01—O002 <sup>ii</sup>                 | 140.43 (8) |
| O00A—Sc01—O005 <sup>i</sup> | 77.86 (9)   | O008—Sc01—O006 <sup>iii</sup>                | 73.35 (8)  |
| O003—Sc01—O005 <sup>i</sup> | 72.67 (7)   | O00A—Sc01—O006 <sup>iii</sup>                | 138.97 (8) |
| O007—Sc01—O005 <sup>i</sup> | 78.45 (8)   | O003—Sc01—O006 <sup>iii</sup>                | 75.29 (8)  |
| O008—Sc01—O004              | 72.16 (7)   | O007—Sc01—O006 <sup>iii</sup>                | 70.07 (7)  |
| O00A—Sc01—O004              | 80.61 (8)   | O005 <sup>i</sup> —Sc01—O006 <sup>iii</sup>  | 136.32 (8) |
| O003—Sc01—O004              | 142.08 (7)  | O004—Sc01—O006 <sup>iii</sup>                | 125.80 (7) |
| O007—Sc01—O004              | 75.78 (8)   | O002 <sup>ii</sup> —Sc01—O006 <sup>iii</sup> | 69.44 (7)  |

Symmetry codes: (i)  $-x+1, -y+1, -z+1$ ; (ii)  $-x+2, -y+1, -z$ ; (iii)  $-x+1, -y+1, -z$ .

**Table S5** Selected angles [°] for **2**.

| Angel                        | Angel/°     | Angel                                        | Angel/°     |
|------------------------------|-------------|----------------------------------------------|-------------|
| O002—Sc01—O009               | 120.32 (10) | O005 <sup>i</sup> —Sc01—O004 <sup>ii</sup>   | 71.93 (9)   |
| O002—Sc01—O007               | 144.34 (9)  | O006—Sc01—O004 <sup>ii</sup>                 | 71.60 (9)   |
| O009—Sc01—O007               | 77.55 (10)  | O002—Sc01—O003 <sup>iii</sup>                | 76.38 (9)   |
| O002—Sc01—O008               | 67.79 (9)   | O009—Sc01—O003 <sup>iii</sup>                | 72.11 (9)   |
| O009—Sc01—O008               | 74.27 (10)  | O007—Sc01—O003 <sup>iii</sup>                | 81.51 (9)   |
| O007—Sc01—O008               | 146.50 (10) | O008—Sc01—O003 <sup>iii</sup>                | 106.24 (10) |
| O002—Sc01—O005 <sup>i</sup>  | 72.88 (9)   | O005 <sup>i</sup> —Sc01—O003 <sup>iii</sup>  | 73.76 (9)   |
| O009—Sc01—O005 <sup>i</sup>  | 138.25 (9)  | O006—Sc01—O003 <sup>iii</sup>                | 143.80 (9)  |
| O007—Sc01—O005 <sup>i</sup>  | 74.27 (9)   | O004 <sup>ii</sup> —Sc01—O003 <sup>iii</sup> | 142.44 (9)  |
| O008—Sc01—O005 <sup>i</sup>  | 139.19 (9)  | C00B—O002—Sc01                               | 118.4 (2)   |
| O002—Sc01—O006               | 135.12 (9)  | C00A—O003—Sc01 <sup>iii</sup>                | 117.3 (2)   |
| O009—Sc01—O006               | 75.09 (9)   | C00C—O004—Sc01 <sup>ii</sup>                 | 117.6 (2)   |
| O007—Sc01—O006               | 76.84 (9)   | C00B—O005—Sc01 <sup>i</sup>                  | 115.9 (2)   |
| O008—Sc01—O006               | 78.71 (10)  | C00C—O006—Sc01                               | 118.1 (2)   |
| O005 <sup>i</sup> —Sc01—O006 | 125.93 (9)  | Sc01—O007—H00A                               | 111.3       |
| O002—Sc01—O004 <sup>ii</sup> | 79.35 (9)   | Sc01—O007—H00B                               | 110.9       |
| O009—Sc01—O004 <sup>ii</sup> | 145.44 (9)  | H00A—O007—H00B                               | 102.9       |
| O007—Sc01—O004 <sup>ii</sup> | 103.20 (10) | Sc01—O008—H00C                               | 110.3       |
| O008—Sc01—O004 <sup>ii</sup> | 90.28 (10)  | Sc01—O008—H00D                               | 110.1       |

Symmetry codes: (i)  $-x+1, -y+1, -z$ ; (ii)  $-x+2, -y+2, -z$ ; (iii)  $-x+1, -y+1, -z+1$ .

**Table S6** Specified hydrogen bonds for **1**.

| D-H...A                | d(D-H) | D(H...A) | D(D...A) | <(DHA) |
|------------------------|--------|----------|----------|--------|
| O(008)-H(00A)...O(009) | 0.86   | 1.95     | 2.746(3) | 152.6  |
| O(008)-H(00B)...O(00E) | 0.86   | 1.91     | 2.714(3) | 155.9  |
| O(00A)-H(00C)...O(009) | 0.85   | 2.10     | 2.830(3) | 142.9  |
| O(00F)-H(00J)...O(00E) | 0.85   | 2.00     | 2.764(4) | 149.6  |
| O(00G)-H(00K)...O(00F) | 0.85   | 2.06     | 2.839    | 152.5  |

**Table S7** Specified hydrogen bonds for **2**.

| D-H...A          | D-H  | H...A | D...A    | <(DHA) |
|------------------|------|-------|----------|--------|
| O007-H00B...O00D | 0.88 | 1.87  | 2.718(5) | 161.4  |
| O008-H00D...O003 | 0.87 | 2.23  | 2.872(3) | 130.5  |
